# Supplementary material for: Lack of Association betweenCLEC5AGene Single-Nucleotide Polymorphisms and Kawasaki Disease in Taiwanese Children
Source: Hindawi journal article supplement (doi:10.1155/2012/398628), 2011-12-22
Supplement: f1 [file 398628.f1.pdf]

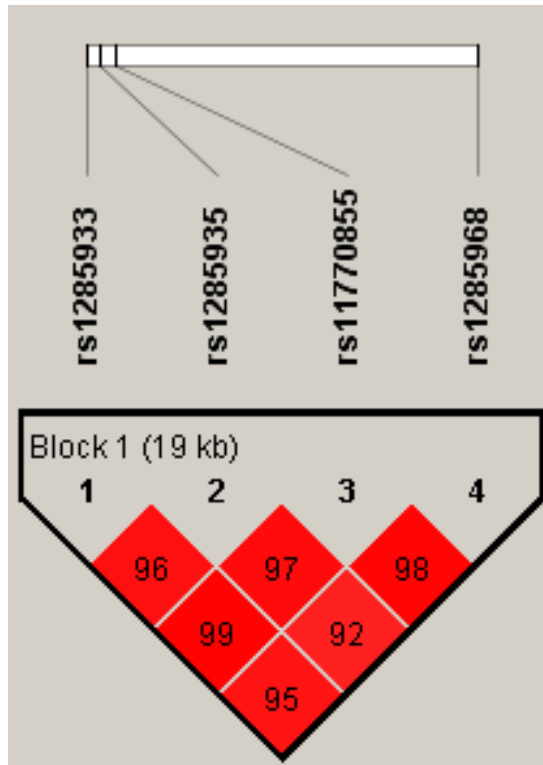

Supplemental Figure 1. *CLEC5A* gene LD and haplotype block structure in KD. The number on the cell is the LOD score of D'.

Supplemental Table 1: Haplotype frequencies of the *CLEC5A* gene in controls and patients with Kawasaki disease

| rs1285968/ rs11770855/ rs1285935/ rs1285933 | Case (%)<br>(n = 381) | Control (%)<br>(n = 664) | OR (95% CI)      | P Value |
|---------------------------------------------|-----------------------|--------------------------|------------------|---------|
| A/G/A/C                                     | 4 (0.5)               | 1 (0.1)                  | -                | -       |
| A/G/G/C                                     | 354 (48.1)            | 590 (46.8)               | 1.25 (0.97-1.61) | 0.0849  |
| A/A/A/C                                     | 5 (0.7)               | 10 (0.8)                 | -                | -       |
| G/G/G/C                                     | 1 (0.1)               | 2 (0.2)                  | -                | -       |
| G/A/A/C                                     | 188 (25.5)            | 320 (25.4)               | 1.22 (0.92-1.62) | 0.1603  |
| A/A/G/T                                     | 5 (0.7)               | 1 (0.1)                  | -                | -       |
| A/A/G/C                                     | 51 (6.9)              | 81 (6.4)                 | 1.31 (0.87-1.98) | 0.1967  |
| G/A/A/T                                     | 6 (0.8)               | 2 (0.2)                  | -                | -       |
| G/A/G/T                                     | 121 (16.4)            | 252 (20.0)               | Reference        | -       |

Haplotype frequencies of less than 1% were excluded.

Supplemental Table 2: Haplotype frequencies of the *CLEC5A* gene in patients with Kawasaki disease with or without coronary artery lesion formation

| rs1285968/ rs11770855/ rs1285935/<br>rs1285933 | CAL (%)<br>(n = 37) | Without (%)<br>(n = 336) | OR (95% CI)                   | P Value |
|------------------------------------------------|---------------------|--------------------------|-------------------------------|---------|
| A/G/A/C                                        | 1 (1.5)             | 3 (0.5)                  | -                             | -       |
| A/G/G/C                                        | 31 (45.6)           | 315 (48.3)               | 1.04 (0.49-2.20)              | 0.9116  |
| A/A/A/C                                        | 0 (0.0)             | 5 (0.8)                  | -                             | -       |
| G/G/G/C                                        | 1 (1.5)             | 0 (0.0)                  | 1.21 (0.54-2.69) <sup>a</sup> | 0.6474  |
| G/A/A/C                                        | 18 (26.4)           | 167 (25.6)               |                               |         |
| A/A/G/T                                        | 1 (1.5)             | 4 (0.6)                  | 1.51 (0.54-4.21) <sup>b</sup> | 0.4244  |
| A/A/G/C                                        | 6 (8.8)             | 45 (6.9)                 |                               |         |
| G/A/A/T                                        | 0 (0.0)             | 6 (0.9)                  | -                             | -       |
| G/A/G/T                                        | 10 (14.7)           | 106 (16.3)               | Reference                     |         |

Haplotype frequencies of less than 1% were excluded. <sup>a</sup>G/G/G/C and G/A/A/C were grouped together. <sup>b</sup>A/A/G/T and A/A/G/C were grouped together.

Supplemental Table 3: Haplotype frequencies of the *CLEC5A* gene in patients with Kawasaki disease responding or not responding to intravenous immunoglobulin (IVIG) treatment

| rs1285968/ rs11770855/ rs1285935/<br>rs1285933 | Resistant<br>(%) (n = 49) | Responsive<br>(%) (n = 326) | OR (95% CI)                   | P Value |
|------------------------------------------------|---------------------------|-----------------------------|-------------------------------|---------|
| A/G/A/C                                        | 0 (0.0)                   | 4 (0.6)                     | -                             | -       |
| A/G/G/C                                        | 51 (53.1)                 | 297 (47.0)                  | 1.43 (0.75-2.73)              | 0.2803  |
| A/A/A/C                                        | 1 (1.0)                   | 4 (0.6)                     | -                             | -       |
| G/G/G/C                                        | 1 (1.0)                   | 0 (0.0)                     | 1.11 (0.54-2.29) <sup>a</sup> | 0.7828  |
| G/A/A/C                                        | 21 (21.9)                 | 165 (26.1)                  | -                             | -       |
| A/A/G/T                                        | 0 (0.0)                   | 5 (0.8)                     | -                             | -       |
| A/A/G/C                                        | 7 (7.3)                   | 44 (7.0)                    | 1.32 (0.49-3.53)              | 0.5774  |
| G/A/A/T                                        | 2 (2.1)                   | 4 (0.6)                     | -                             | -       |
| G/A/G/T                                        | 13 (13.6)                 | 108 (17.1)                  | Reference                     | -       |

Haplotype frequencies of less than 1% were excluded. <sup>a</sup>G/G/G/C and G/A/A/C were grouped together.
